# Supplementary material
Source: Elsevier journal article supplement (https://www.sciencedirect.com/science/article/pii/S0034935618301130)
Supplement: mmc1 [file S0034935618301130:mmc1.pdf]

## ANEXO

# Valoración preanestésica Procedimiento Endoscópico

Paciente

Motivo de la exploración:

Procedimiento a realizar:

Fecha de exploración:

Edad:

Peso:

Talla:

**ASA:**

### MEDICACIÓN ACTUAL:

### ANTIAGREGACIÓN Y ANTICOAGULACIÓN:

### ALERGIAS:

Tabaquismo:

Drogas:

Alcohol:

### EXPLORACIÓN VÍA AÉREA:

•MALLAMPATI: I II III IV

•Cuello corto: SI NO

•Apertura bucal: Buena Reducida

•Prótesis dental: SI NO

## PATOLOGÍA PREVIA:

### RESPIRATORIA:

EPOC

Asma

SAOS

### RENAL:

IRC

Hemodiálisis

### ENDOCRINAS:

Diabetes I

Diabetes II

Obesidad

### CARDIOVASCULAR:

HTA

Arritmia

C. Isquémica

IAM

Ángor

Portador STENT

I. Cardíaca

MCP

Valvulopatía

Prótesis valvular

### DIGESTIVO:

Úlcus

Hepatopatía

### NEUROLÓGICA:

ACVA

TCE

Parkinson

Epilepsia

☐ Se informa y entrega Consentimiento informado

☐ Firma Consentimiento informado

Importante: Ayunas y acompañamiento
